# Supplementary material for: The crystal structure of human dopamine β-hydroxylase at 2.9 Å resolution
Source: PubMed Central journal article supplement (PMC4846438; doi:10.1126/sciadv.1500980), 2016-04-08
Supplement: 1500980_SM.pdf [file 1500980_SM.pdf]

## Supplementary Materials for

### The crystal structure of human dopamine $\beta$ -hydroxylase at 2.9 Å resolution

Trine V. Vendelboe, Pernille Harris, Yuguang Zhao, Thomas S. Walter, Karl Harlos, Kamel El Omari, Hans E. M. Christensen

Published 8 April 2016, *Sci. Adv.* **2**, e1500980 (2016)  
DOI: 10.1126/sciadv.1500980

#### The PDF file includes:

- Supplementary Materials and Methods
- Fig. S1. Overall domain alignment of copper-containing hydroxylases.
- Fig. S2. Sequence alignment of copper-containing hydroxylases.
- Fig. S3. Sequence alignment of DBH from different organisms.
- Fig. S4. Size exclusion analysis of purified DBH tetramer and dimer.
- Fig. S5. Analysis of DBH tetramer conversion as a function of pH.
- Fig. S6. Analysis of DBH tetramer conversion as a function of ionic strength.
- Fig. S7. Mass spectrum of a nonseparated sample containing a mixture of dimeric and tetrameric DBH.
- Fig. S8. SDS–polyacrylamide gel electrophoresis analysis of dimeric and tetrameric DBH under nonreducing and reducing conditions.
- Fig. S9. Structure of the human DBH dimer emphasizing the integrated structure created by the C-terminal interaction with both the Cu<sub>M</sub> domain and the DOMON domain.
- Fig. S10. Modeled glycosylation environments in chain A with  $2F_{\text{obs}} - F_{\text{calc}}$  electron density maps contoured at  $\sigma$  of 1.0.
- Fig. S11. Modeled glycosylation environments in chain B with  $2F_{\text{obs}} - F_{\text{calc}}$  electron density maps contoured at  $\sigma$  of 1.0.
- Fig. S12. Structure of the human DBH dimer with the disulfide bridges and the glycosylation sites highlighted.
- Fig. S13. Sequence alignment of DOMON domains.
- Fig. S14. The dimerization domain disulfide bridges environment with  $2F_{\text{obs}} - F_{\text{calc}}$  electron density map contoured at  $\sigma$  of 1.0.
- Table S1. Secondary structure assignment in human DBH.

- Table S2. Domain-domain hydrogen bond contacts in chains A and B.
- Table S3. Data collection, phasing, and refinement statistics.

## **SUPPLEMENTARY MATERIALS AND METHODS**

### **Mass spectrometry analysis and sample preparation**

Native protein mass spectrometry analysis was carried out on a LCT premier instrument with a nano-ESI source (Waters). The spectrometer was equilibrated with 100 mg/ml CsI in 50 % 2-propanol. The spectra were recorded in positive ion mode, with a cone voltage of 50-200 V, an ion guide I voltage of 175 V and a capillary voltage of  $1.5 - 1.75 \times 10^3$  V.

DBH samples at different pH and ionic strength were prepared by buffer exchange using Micro Bio-Spin 6 Chromatography columns (Bio-Rad). The columns were prepared with ammonium acetate at various concentrations and pH values. The ammonium acetate solutions were prepared from a 7.5 M ammonium acetate stock solution in plastic bottle (from Sigma Aldrich). The pH adjustments were done with diluted ammonia or acetic acid in plastic containers in order to avoid sodium ion contamination from glassware. Samples were incubated at least 1 h at room temperature before analysis.

### **Size exclusion analysis**

The analyses were performed on a Superdex 200 10/300 column in 10 mM hepes, 150 mM NaCl, pH 7.5 at a flow rate of 0.5 ml/min using an ÄKTA purifier (GE Healthcare, USA). The absorbance was measured at 280 nm.

### **SDS-Page analysis**

Sodium dodecyl sulfate–polyacrylamide gel electrophoresis (SDS-Page) analysis was carried out according to manufacturer's recommendations, using a precast gel and markers from Bio-Rad. The gel is stained with Coomassie blue G-250.

## FIGURES AND TABLES

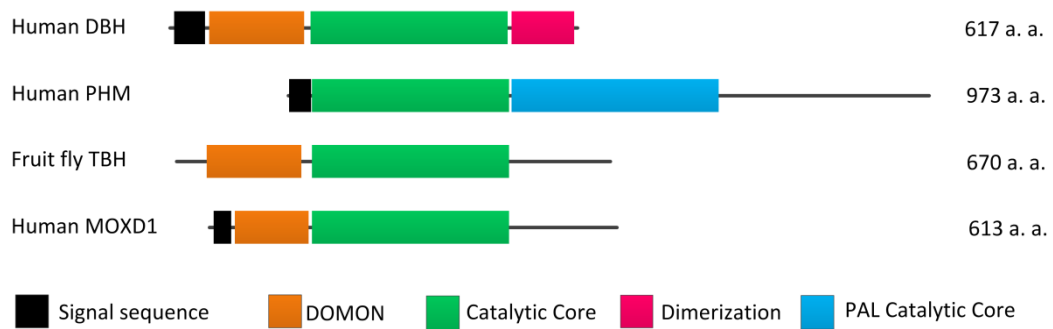

**fig. S1. Overall domain alignment of copper-containing hydroxylases.** DBH, dopamine  $\beta$ -hydroxylase; PHM, peptidylglycine  $\alpha$ -hydroxylating monooxygenase; TBM, tyramine  $\beta$ -mono-oxygenase and MOXD1, monooxygenase X. DOMON, dopamine  $\beta$ -hydroxylase N-terminal domain; PAL, peptidyl- $\alpha$ -hydroxyglycine  $\alpha$ -amidating lyase. Amino acid sequence alignments are provided in fig. S2.

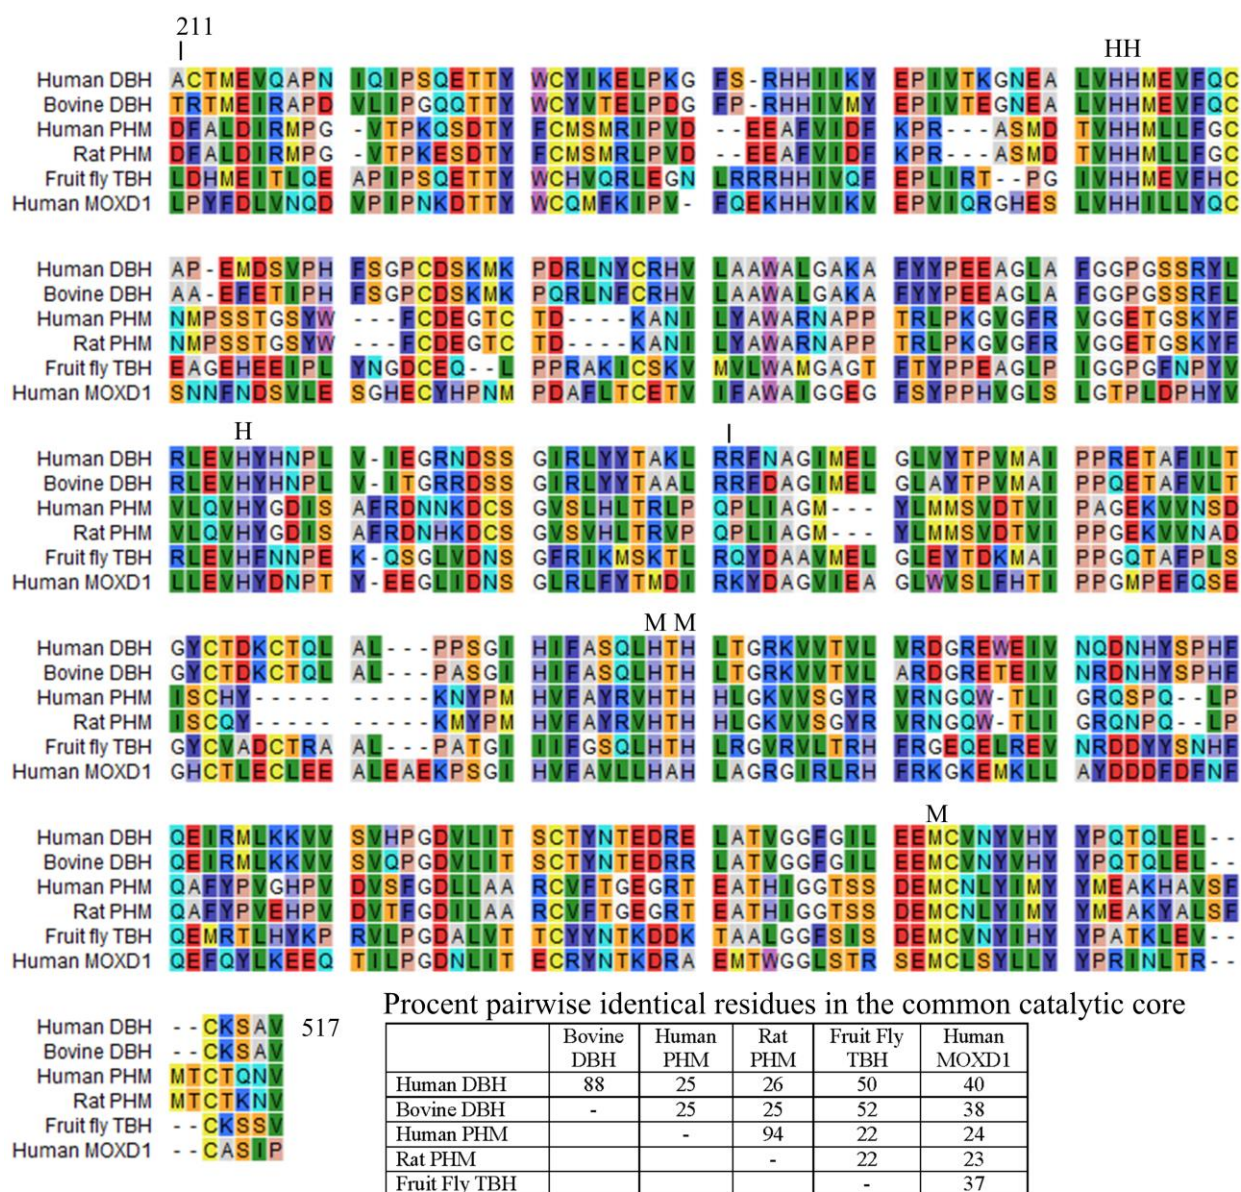

**fig. S2. Sequence alignment of copper-containing hydroxylases.** Human DBH (UniProt id P09172, residue 211-507), bovine (*Bos taurus*) DBH (UniProt id P15101, residue 204-500), human PHM (UniProt id P19021, residue 56-333), rat (*Rattus norvegicus*) PHM (UniProt id P14925, residue 61-338), fruit fly (*Drosophila melanogaster*) TBM (UniProt id Q86B61, residue 262-555) and human MOXD1 (UniProt id Q6UVY6, residue 184-484). Cu<sub>H</sub> and Cu<sub>M</sub> ligands are labelled H and M, respectively. | indicates the boundary between the Cu<sub>H</sub> domain and the Cu<sub>M</sub> domain.

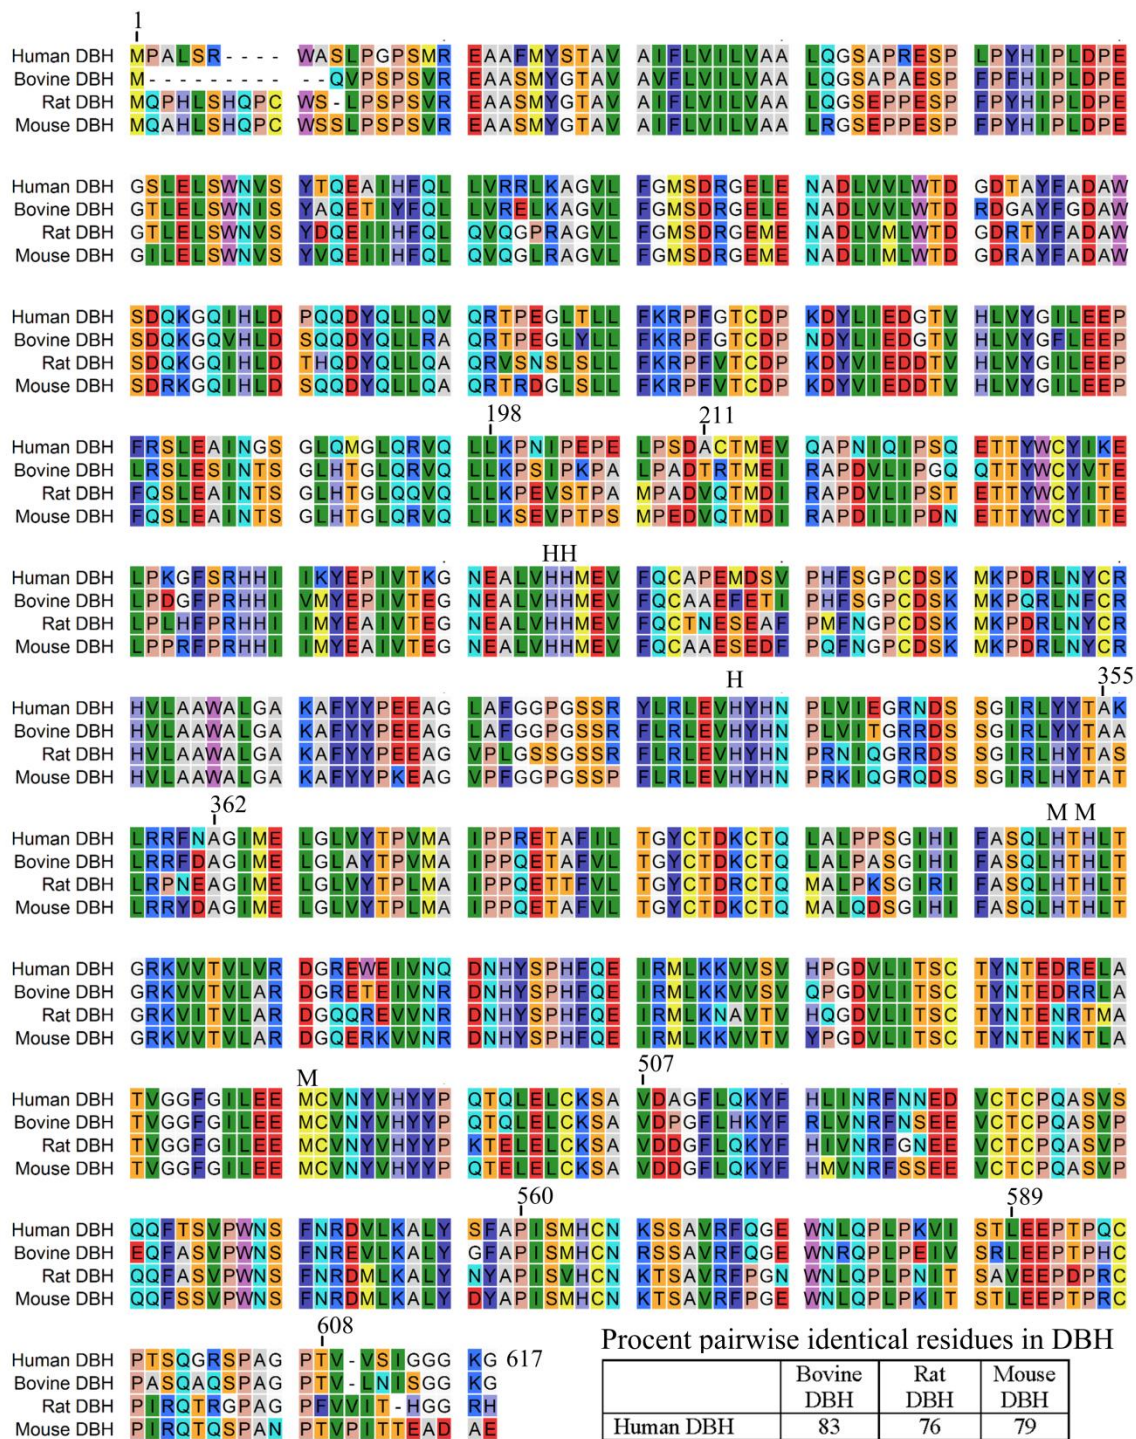

**fig. S3. Sequence alignment of DBH from different organisms.** Human DBH (UniProt id P09172), bovine (*Bos taurus*) DBH (UniProt id P15101), rat (*Rattus norvegicus*) DBH (UniProt id Q05754) and mouse (*Mus musculus*) DBH (UniProt id Q64237). Cu<sub>H</sub> and Cu<sub>M</sub> ligands are labelled H and M, respectively. 14 of 15 cysteine residues (in yellow) are conserved among organisms (Cys<sup>212</sup> is not conserved).

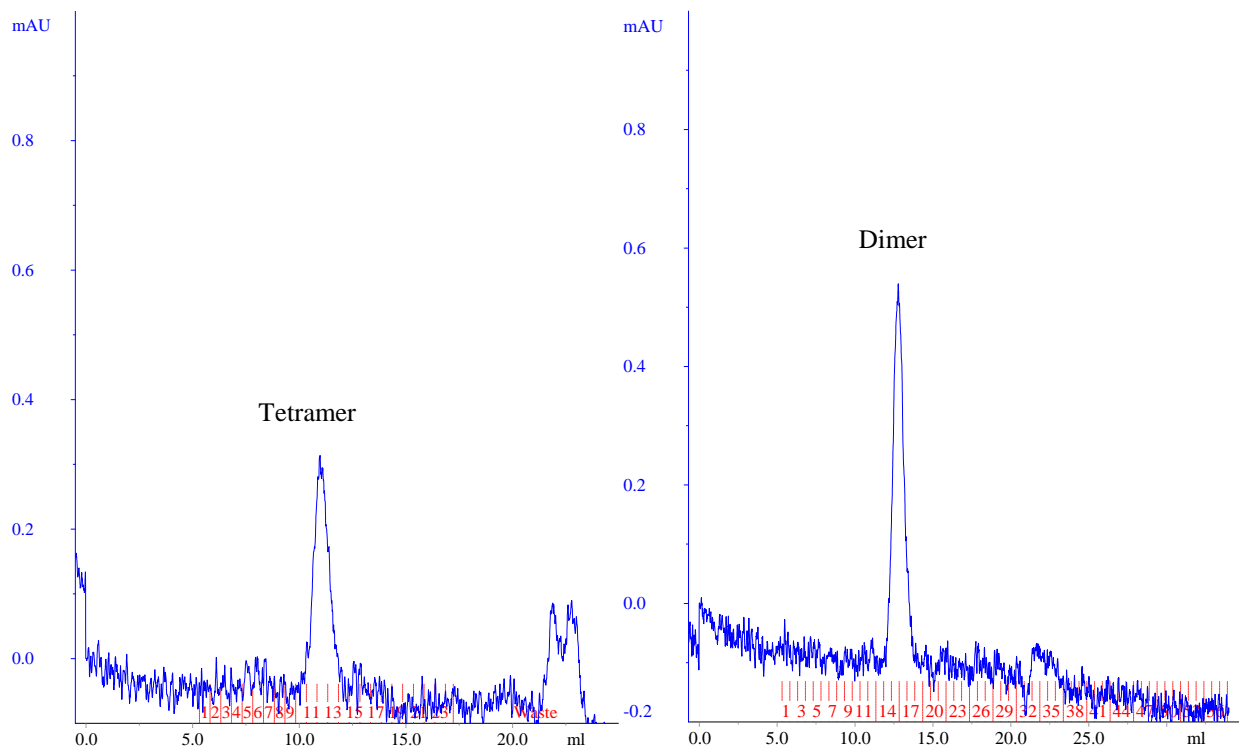

**fig. S4. Size exclusion analysis of purified DBH tetramer and dimer.** To the left analysis of purified DBH tetramer. To the right analysis of purified DBH dimer. The absorbance at 280 nm is shown in blue. In both cases no conversion to the other form is seen, showing that in the purification buffer (10 mM Hepes, 150 mM NaCl, pH 7.5) both the tetramer and the dimer are stable.

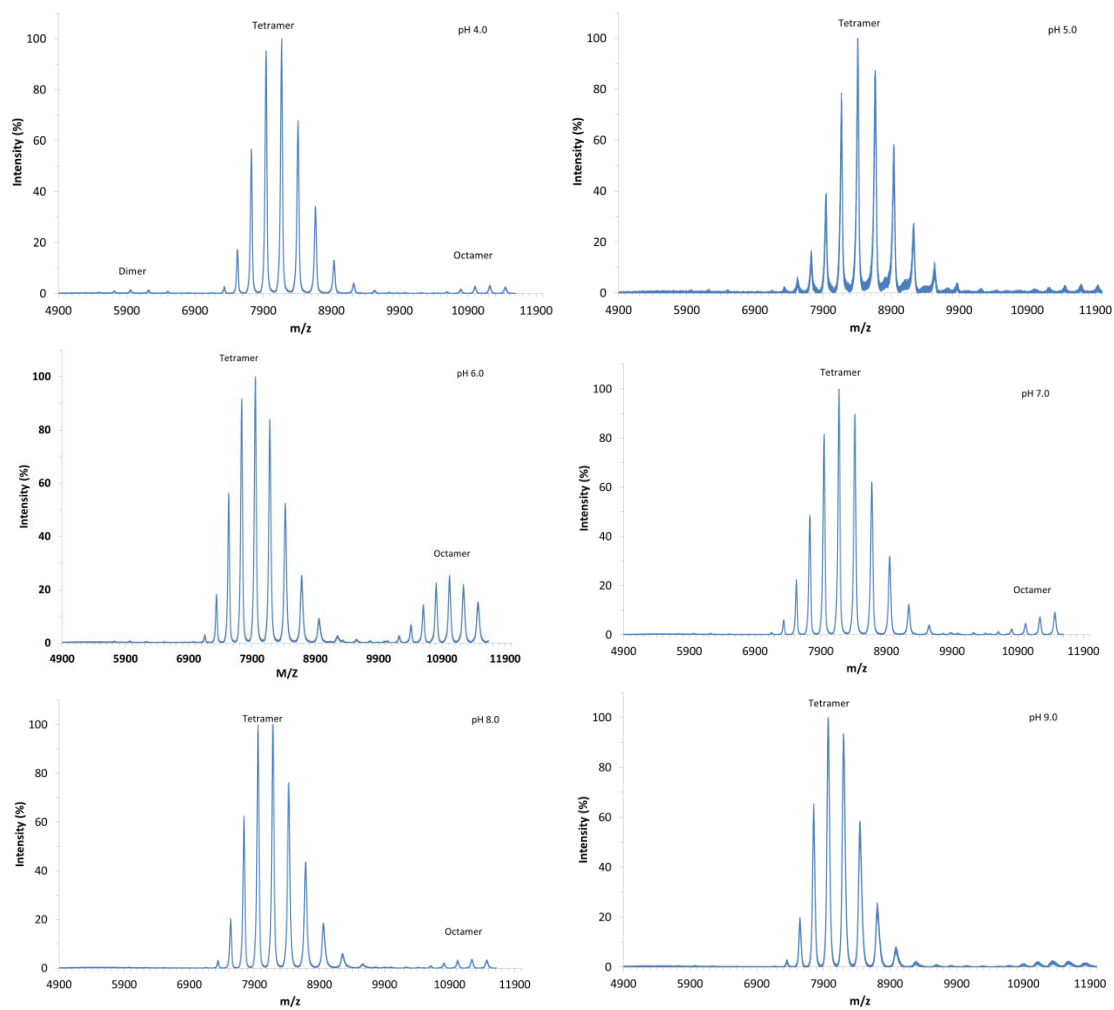

**fig. S5. Analysis of DBH tetramer conversion as a function of pH.** Samples of DBH tetramer were incubated in the pH interval 4 to 9 for 1 hour and analyzed by mass spectrometry. Only the envelop corresponding to the DBH tetramer is observed, no dimer is seen. In some samples small quantities of octamer DBH is observed, which is considered an artefact from the MS analysis.



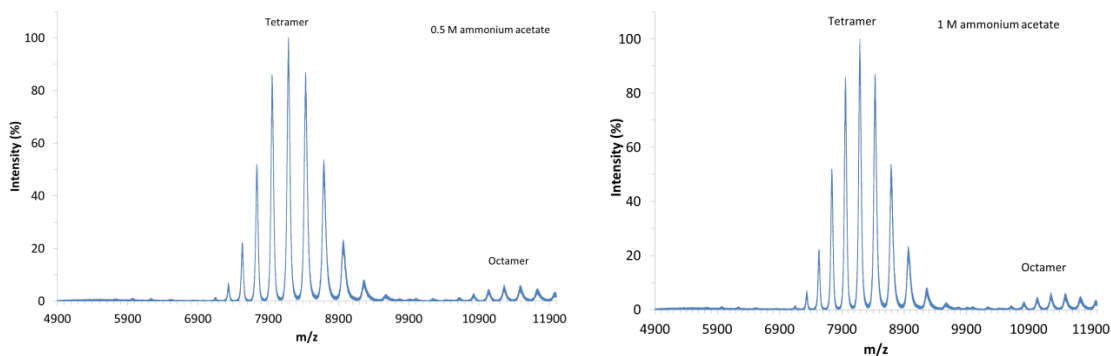

**fig. S6. Analysis of DBH tetramer conversion as a function of ionic strength.** Samples of DBH tetramer were incubated at ionic strength 0.5 M and 1M at pH 6 and analyzed by mass spectrometry. Only the envelop corresponding to the DBH tetramer is observed, no dimer is seen.

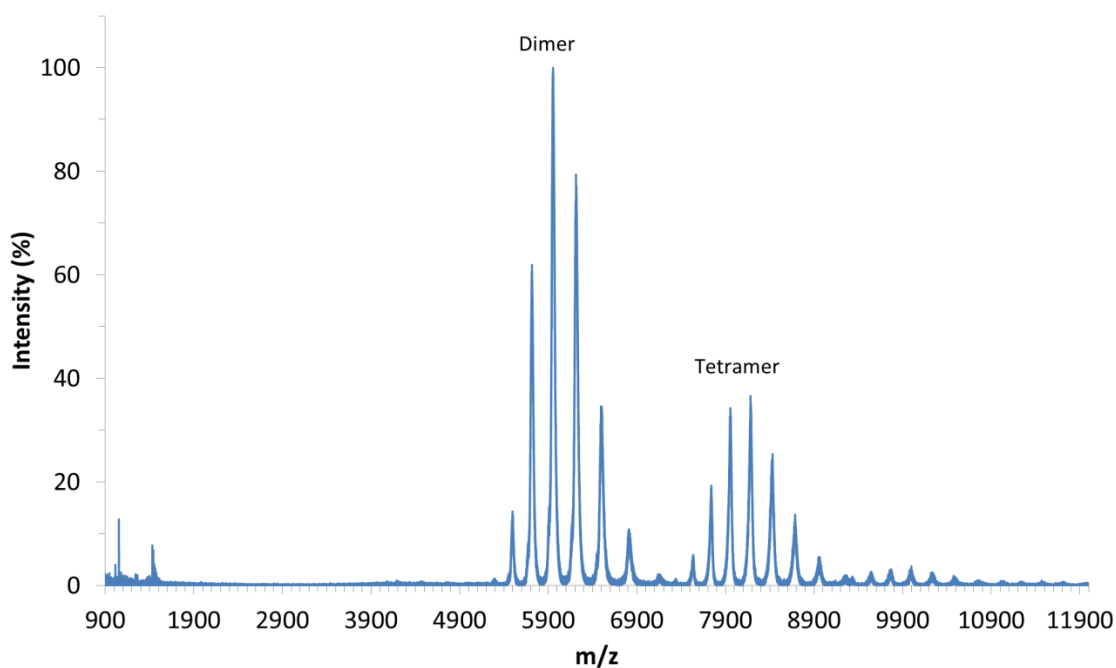

**fig. S7. Mass spectrum of a nonseparated sample containing a mixture of dimeric and tetrameric DBH.** The sample is 15  $\mu$ M DBH in 0.5 M ammonium acetate. Both tetramer DBH and dimer DBH are observed, confirming that both dimeric and tetrameric DBH are easily observed if presence.

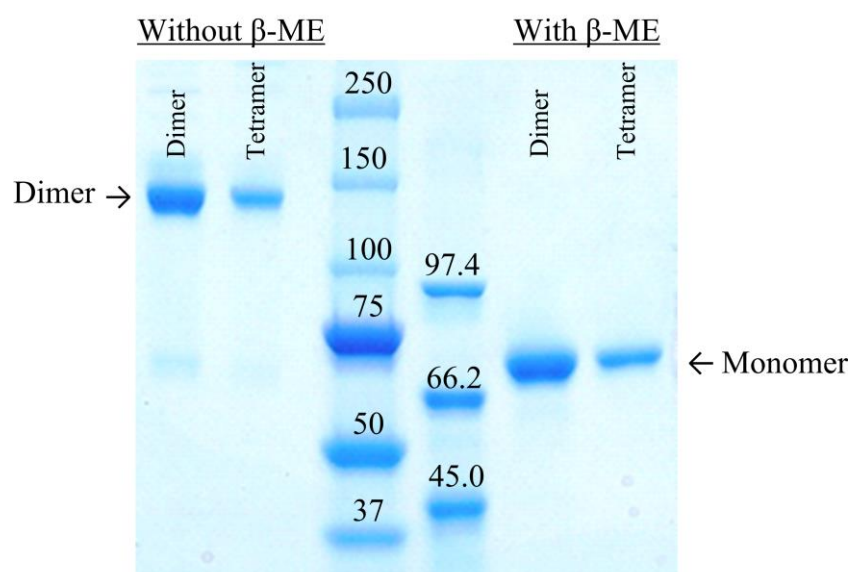

**fig. S8. SDS–polyacrylamide gel electrophoresis analysis of dimeric and tetrameric DBH under nonreducing and reducing conditions.** Under non-reducing conditions (to the left) dimeric and tetrameric DBH have the same mass corresponding to a dimer of ~150 kDa. To the right under reducing conditions (with β-mercaptoethanol) dimeric and tetrameric DBH both have the mass corresponding to a monomer of ~70 kDa. Markers (given in kDa) are Precision Plus Protein Standards and Low Range Standards from Bio-Rad. The SDS-Page analysis reveals that the dimer of dimers in the tetramer are not covalently bound, as no reducing agent is required to separate the tetramer into dimer under denaturation conditions.

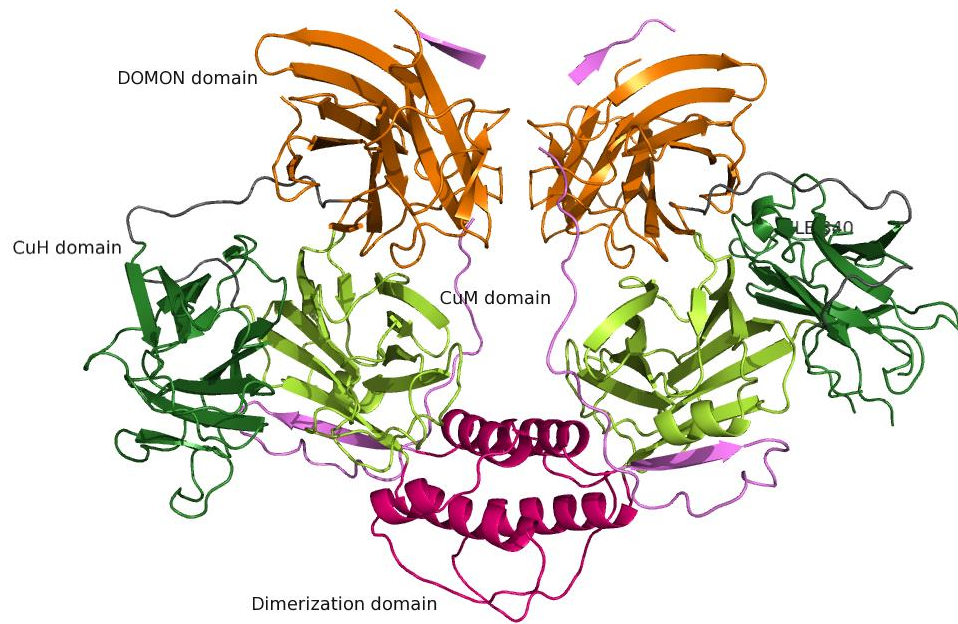

**fig. S9. Structure of the human DBH dimer emphasizing the integrated structure created by the C-terminal interaction with both the Cu<sub>M</sub> domain and the DOMON domain. The C-terminus is in violet.**

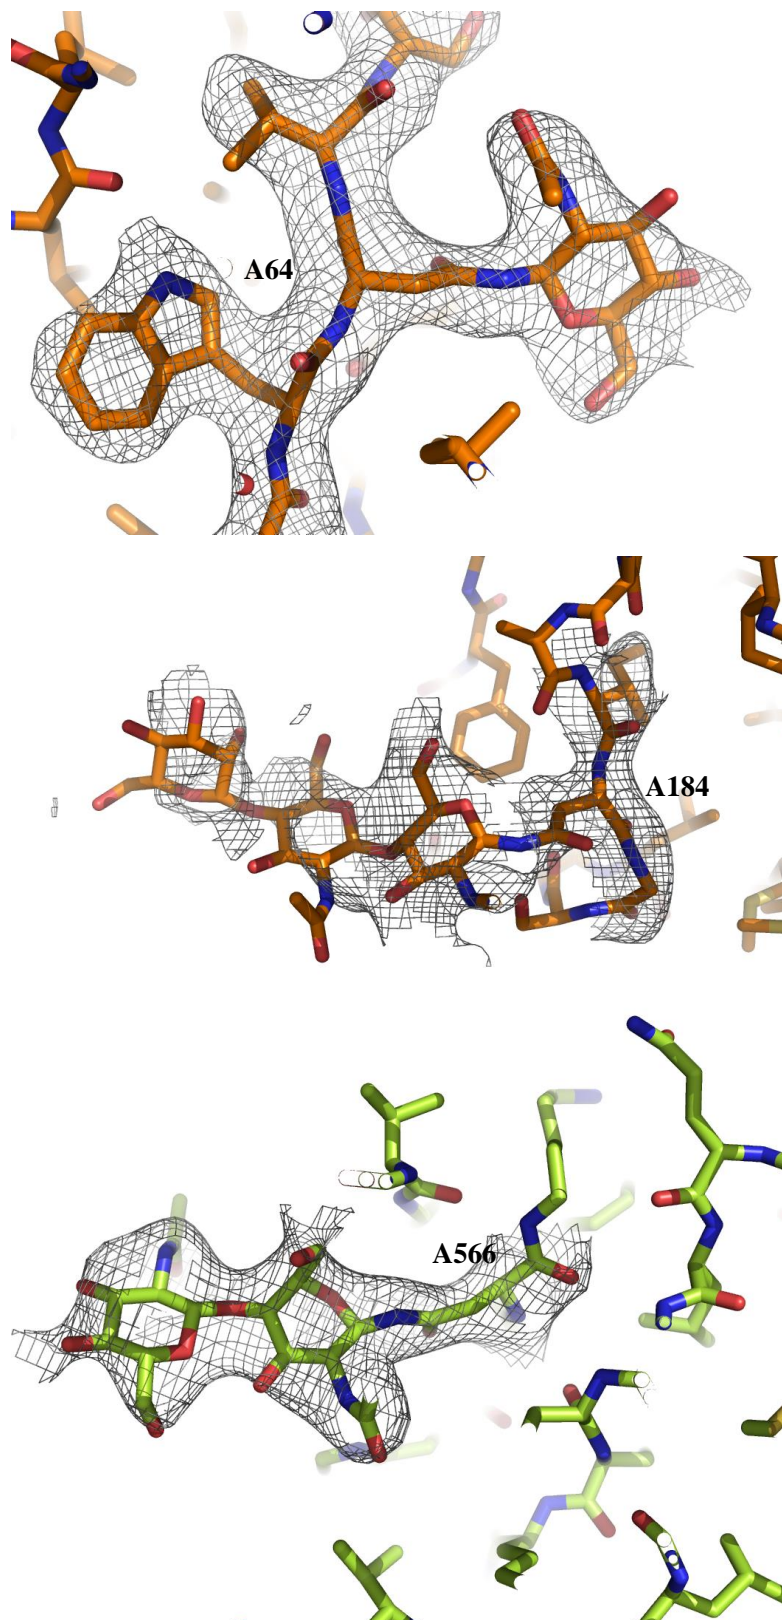

**fig. S10. Modeled glycosylation environments in chain A with  $2F_{\text{obs}} - F_{\text{calc}}$  electron density maps contoured at  $\sigma$  of 1.0. Colored in domain colors (same color scheme as in Fig. 1 and Fig. 2) and with oxygen in red and nitrogen in blue.**

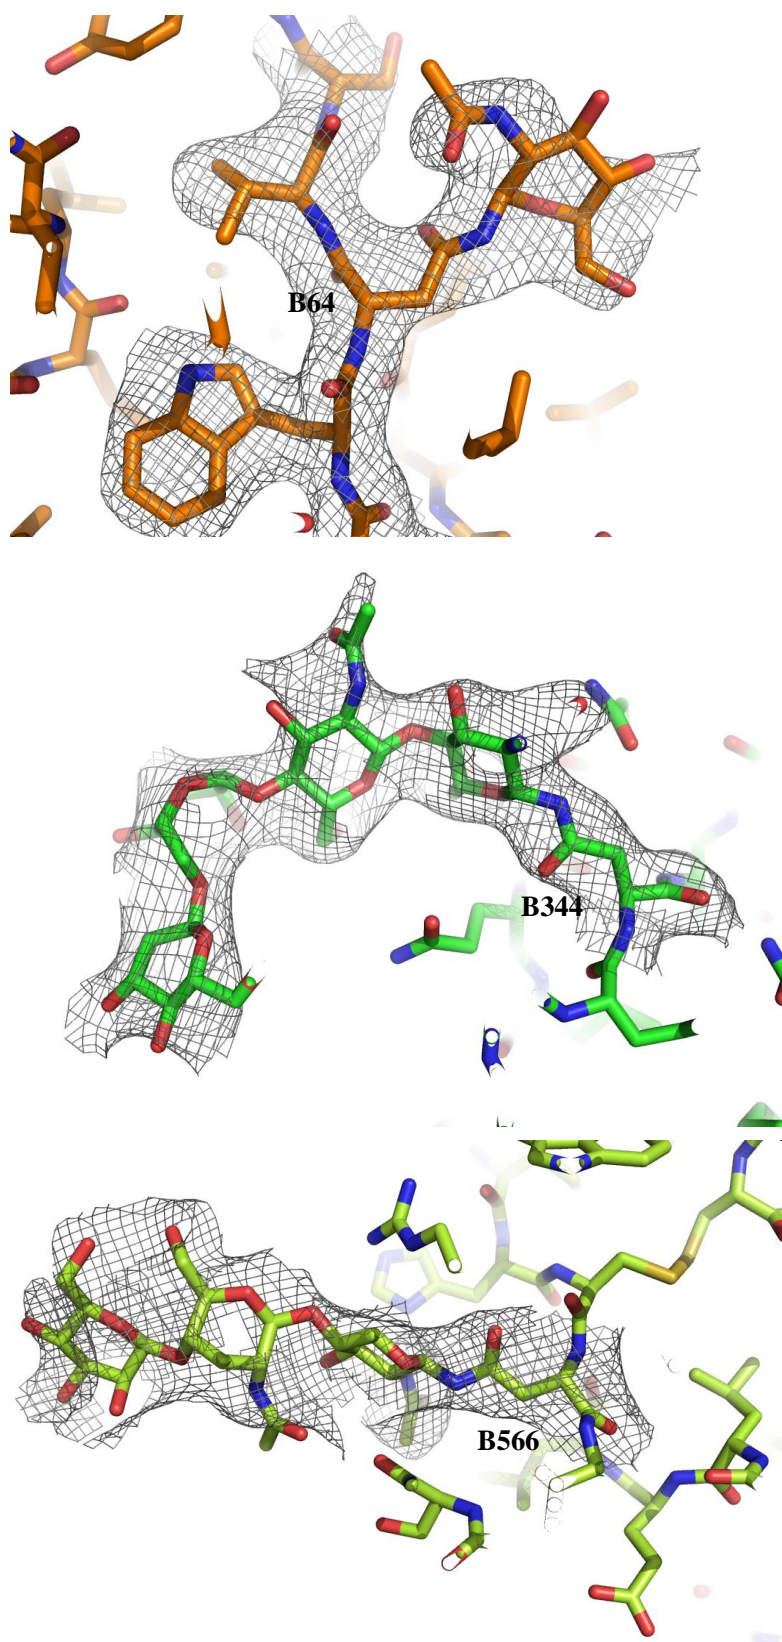

**fig. S11. Modeled glycosylation environments in chain B with  $2F_{\text{obs}} - F_{\text{calc}}$  electron density maps contoured at  $\sigma$  of 1.0. Colored in domain colors (same color scheme as in Fig. 1 and Fig. 2) and with oxygen in red and nitrogen in blue.**

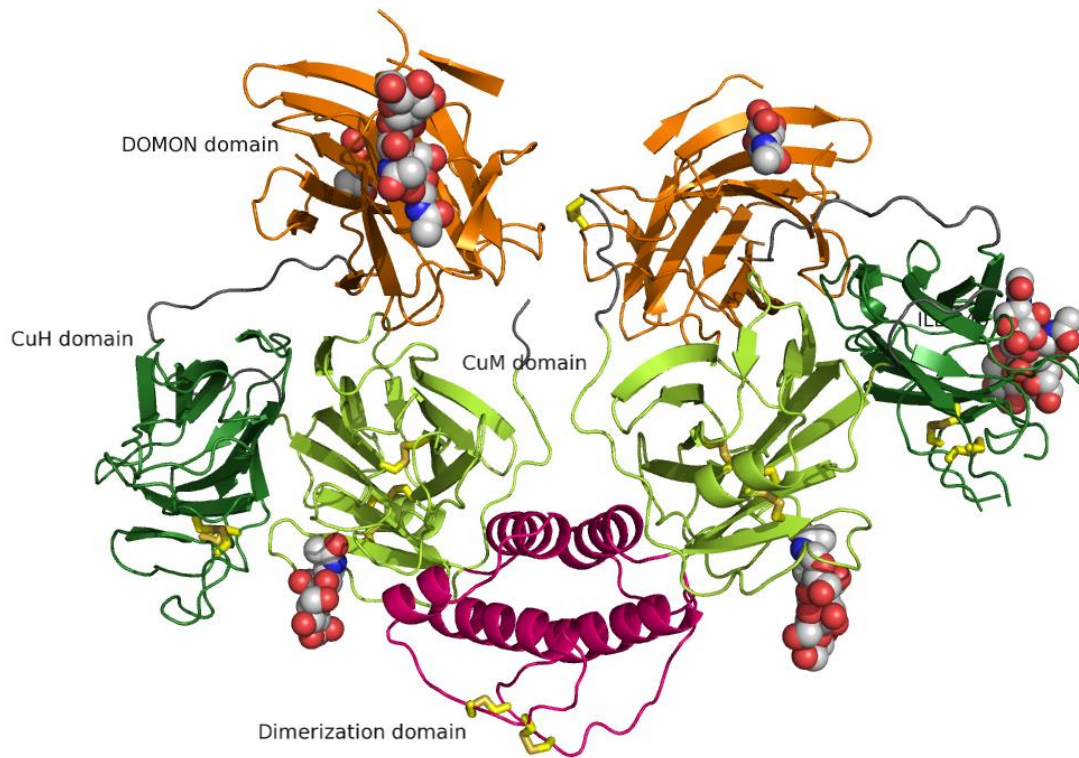

**fig. S12. Structure of the human DBH dimer with the disulfide bridges and the glycosylation sites highlighted.** The disulfide bridges are in yellow and the modeled glycosylation is shown as CPK's.

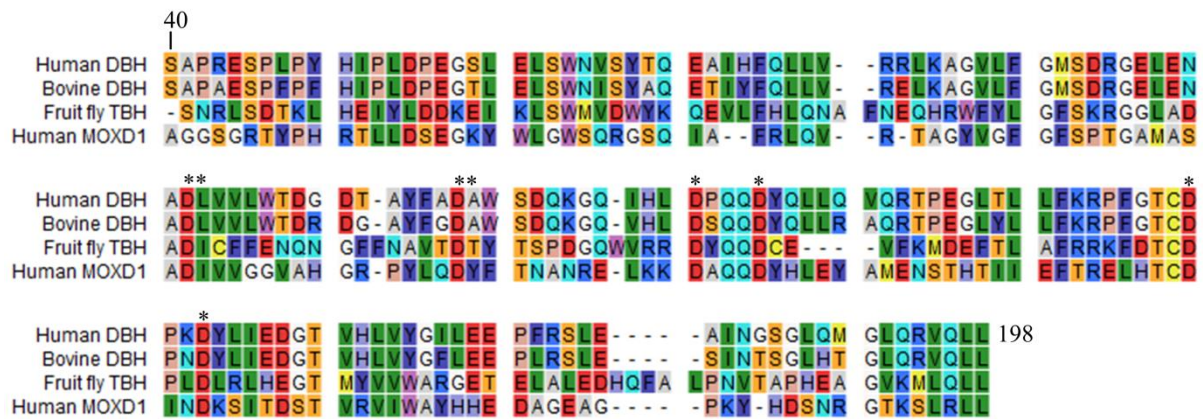

Percent pairwise identical residues in the DOMON domain

|               | Bovine DBH | Fruit Fly TBH | Human MOXD1 |
|---------------|------------|---------------|-------------|
| Human DBH     | 85         | 24            | 28          |
| Bovine DBH    | -          | 25            | 28          |
| Fruit Fly TBH |            | -             | 21          |

**fig. S13. Sequence alignment of DOMON domains.** Human DBH (UniProt id P09172, residue 40-198), bovine (*Bos taurus*) DBH (UniProt id P15101, residue 33-191), fruit fly (*Drosophila melanogaster*) TBM (UniProt id Q86B61 residue 88-251) and human MOXD1 (UniProt id Q6UVY6 residue 18-173). Residues involved in the putative metal binding site are labeled \*, see main text and Fig. 4.

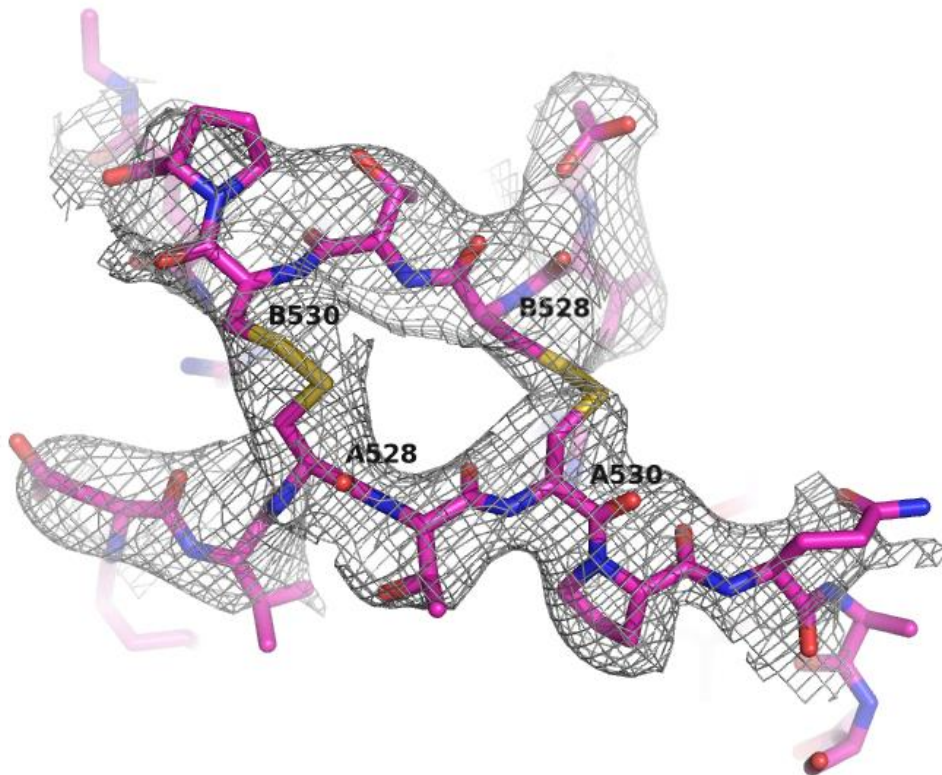

**fig. S14.** The dimerization domain disulfide bridges environment with  $2F_{\text{obs}} - F_{\text{calc}}$  electron density map contoured at  $\sigma$  of 1.0. The disulfide bridges are colored yellow and with oxygen in red and nitrogen in blue.



**table S1. Secondary structure assignment in human DBH.**

| <b>DOMON domain</b>          | A-chain | B-chain |
|------------------------------|---------|---------|
| $\beta$ 1                    | 49-52   | 49-52   |
| $\beta$ 2                    | 59-66   | 59-66   |
| $\beta$ 3                    | 71-78   | 71-78   |
| $\beta$ 4                    | 84-90   | 84-90   |
| $\beta$ 5                    | 98-104  | 95-103  |
| $\beta$ 6                    | 111-117 | 113-117 |
| $\beta$ 7                    | 123-125 | 123-125 |
| $\beta$ 8                    | 132-139 | 131-138 |
| $\beta$ 9                    | 143-150 | 143-150 |
| $\beta$ 10                   | 166-173 | 165-173 |
| $\beta$ 11                   | 191-195 | 188-195 |
| C-term $\beta$ 2             | 608-611 | 609-611 |
| <b>Cu<sub>H</sub> domain</b> |         |         |
| $\beta$ 1                    | 212-217 | 212-217 |
| $\beta$ 2                    | 228-236 | 228-236 |
| $\beta$ 3                    | 244-252 | 244-252 |
| $\beta$ 4                    | 261-268 | 261-268 |
| $\beta$ 5                    | 279-282 | 280-282 |
| $\beta$ 6                    | 297-303 | 298-303 |
| $\beta$ 7                    | 308-310 | 308-310 |
| $\beta$ 8                    | 317-319 | 317-319 |
| $\beta$ 9                    | 327-335 | 327-335 |
| $\beta$ 10                   | 348-354 | 348-354 |
| <b>Cu<sub>M</sub> domain</b> |         |         |
| $\beta$ 1                    | 363-369 | 363-369 |
| $\beta$ 2                    | 384-390 | 384-390 |
| $\alpha$ 1                   | 392-399 | 393-398 |
| $\beta$ 3                    | 404-412 | 404-413 |
| $\beta$ 4                    | 417-425 | 417-425 |
| $\beta$ 5                    | 432-438 | 432-437 |
| $\beta$ 6                    | 445-449 | 447-449 |
| $\beta$ 7                    | 454-456 | 454-456 |
| $\beta$ 8                    | 461-468 | 461-468 |
| $\beta$ 9                    | 489-495 | 488-495 |
| $\beta$ 10                   | 502-507 | 502-507 |
| C-term $\beta$ 1             | 561-567 | 561-567 |
| <b>Dimerization domain</b>   |         |         |
| $\alpha$ 1                   | 509-523 | 509-523 |
| $\alpha^*$                   | 535-539 |         |
| $\alpha$ 2                   | 546-558 | 546-558 |

**table S2. Domain-domain hydrogen bond contacts in chains A and B.** In the A-chain there are 10 hydrogen bonds between the Cu<sub>H</sub> domain and the Cu<sub>M</sub> domain. In the B-chain the contacts are reduced to only 4 hydrogen bonds. Between the DOMON domain and the Cu<sub>H</sub> domain there are no contacts in the A-chain while in the B-chain some non-hydrogen bond interactions are present.

|                                                          | Chain A             | Å   | Chain B            | Å   |
|----------------------------------------------------------|---------------------|-----|--------------------|-----|
| Cu <sub>H</sub> domain<br>with<br>Cu <sub>M</sub> domain | G316 O – A362 N     | 2.9 | Y310 N – M449 SD   | 3.5 |
|                                                          | L304 O – H443 O     | 3.5 | E314 OE1 – Y495 OH | 3.2 |
|                                                          | L304 O – Q445 N     | 2.7 | E314 OE2 – Y495 OH | 3.5 |
|                                                          | L304 O – Q445 O     | 2.9 | G316 O – A362 N    | 3.1 |
|                                                          | A306 N – Q445 O     | 3.1 |                    |     |
|                                                          | Y230 OH – F481 O    | 2.3 |                    |     |
|                                                          | H297 NE2 – Q497 NE2 | 3.5 |                    |     |
|                                                          | R296 O – E501 OE1   | 2.6 |                    |     |
|                                                          | H297 N – E501 OE1   | 3.4 |                    |     |
|                                                          | V298 N – E501 OE2   | 2.9 |                    |     |

**table S3. Data collection, phasing, and refinement statistics\*.**

|                                                      | Native-1               | Native-2               | SeMet                  | K <sub>2</sub> PtCl <sub>4</sub> |
|------------------------------------------------------|------------------------|------------------------|------------------------|----------------------------------|
| <b>Data collection</b>                               |                        |                        |                        |                                  |
| Space group                                          | C222 <sub>1</sub>      | C222 <sub>1</sub>      | C222 <sub>1</sub>      | C222 <sub>1</sub>                |
| Cell dimensions                                      |                        |                        |                        |                                  |
| <i>a</i> , <i>b</i> , <i>c</i> (Å)                   | 102.8, 119.1, 224.8    | 102.4, 118.8, 225.2    | 102.5, 119.0, 225.5    | 103.0, 119.8, 225.4              |
| <i>α</i> , <i>β</i> , <i>γ</i> (°)                   | 90, 90, 90             | 90, 90, 90             | 90, 90, 90             | 90, 90, 90                       |
| Wavelength                                           | 1.0073                 | 1.0071                 | <i>Peak</i><br>0.9789  | <i>Peak</i><br>1.0714            |
| Resolution (Å)                                       | 63.98-2.90 (2.98-2.90) | 53.43-2.67 (2.74-2.67) | 56.37-3.08 (3.11-3.08) | 57.88-3.83 (3.93-3.83)           |
| <i>R</i> <sub>sym</sub> or <i>R</i> <sub>merge</sub> | 0.147 (1.263)          | 0.300 (3.738)          | 0.253 (0.489)          | 0.405 (3.019)                    |
| <i>I</i> / <i>σ<sub>I</sub></i>                      | 10.6 (1.6)             | 10.6 (1.1)             | 11.7 (1.7)             | 6.4 (0.9)                        |
| Completeness (%)                                     | 99.9 (99.8)            | 65.5 (19.4)            | 92.3 (46.7)            | 96.1 (54.1)                      |
| Redundancy                                           | 6.5 (6.9)              | 16.0 (9.5)             | 11.2 (1.7)             | 11.2 (8.7)                       |
| <b>Refinement</b>                                    |                        |                        |                        |                                  |
| Resolution (Å)                                       | 63.9-2.90              |                        |                        |                                  |
| No. of reflections                                   | 30957 (223)            |                        |                        |                                  |
| <i>R</i> <sub>work</sub> / <i>R</i> <sub>free</sub>  | 0.232/ 0.270           |                        |                        |                                  |
| No. atoms                                            |                        |                        |                        |                                  |
| Protein                                              | 8945                   |                        |                        |                                  |
| Ligand/ion                                           | 1                      |                        |                        |                                  |
| Water                                                | 14                     |                        |                        |                                  |
| B-factors                                            |                        |                        |                        |                                  |
| Protein                                              | 75.1                   |                        |                        |                                  |
| Cu-ion                                               | 162.1                  |                        |                        |                                  |
| Water                                                | 42.4                   |                        |                        |                                  |
| R.m.s deviations                                     |                        |                        |                        |                                  |
| Bond lengths (Å)                                     | 0.007                  |                        |                        |                                  |
| Bond angles (°)                                      | 1.50                   |                        |                        |                                  |

Native-1 and 2 were collected with a single crystal. For SeMet and K<sub>2</sub>PtCl<sub>4</sub> three crystals were used.

\*Highest resolution shell is shown in parenthesis.
